# Supplementary material
Source: PubMed Central journal article supplement (PMC4434723)
Supplement: pnas.201506255SI.pdf [file pnas.201506255SI.pdf]

# Supporting Information

He et al. 10.1073/pnas.1506255112

## SI Materials and Methods

**Targeted Next-Generation Sequencing.** To capture all genetic variations/mutations in the 9q22 locus, we resequenced blood DNA from 22 patients with PTC. Customized sequence capture was conducted by means of an Agilent SureSelect Target Enrichment kit to cover the entire region (chromosome 19: 60,080,000–67,090,000 (hg19)) as described (1, 2). Paired-end libraries were sequenced on an Illumina HiSeq2000 platform by the Biomedical Genomics Core of the Research Institute at Nationwide Children's Hospital (Columbus, OH). We sequenced 30–40 million reads (15–20 million pairs) for each sample, and 100-bp paired-end reads were aligned to the human genome (hg19) using Burrows-Wheeler alignment tool with default settings. Alignment data were stored in a binary alignment/map format and visualized using Integrative Genomics Viewer software (Broad Institute). Duplicate pairs were removed using SAMtools, and only reads with reliable alignment quality (mapping quality >30) were used to detect variants in this region. Variants were detected using the pileup function of Samtools/BCFtools.

**In Silico Analysis.** Computer analyses were performed using the UCSC Genome Browser ([genome.ucsc.edu/cgi-bin/hgGateway](http://genome.ucsc.edu/cgi-bin/hgGateway); Assembly GRCh37/hg19, February 2009). Potential binding sites harboring the SNPs were searched for by TRANSFAC database scanning of the sequences in search of binding sites for known TFs (3). Score changes induced by the SNP were calculated. To explore the epigenetic profile of each SNP, the chromatin state segmentation profiles (ChromHMM) generated by the ENCODE project ([genome.ucsc.edu](http://genome.ucsc.edu)) were studied. To assess the possible functional role of each SNP, we used the ENCODE-based tools HaploReg V2 and V3 ([www.broadinstitute.org/mammals/haploreg](http://www.broadinstitute.org/mammals/haploreg)).

**SNP Genotyping, Imputation, and Haplotype Analyses.** SNP genotyping was carried out using a standard protocol as described (4).

The PCR primer sequences are provided in Table S5. The PCR assays were performed according to a standard protocol as follows: 2 min at 94 °C; followed by 30 cycles of 30 s at 94 °C, 30 s at 58 °C, and 30 s at 72 °C; followed by a final extension of 10 min at 72 °C. An ABI 3730 DNA Analyzer (Applied Biosystems) was used for the allele analysis. Genotyping of the four selected SNPs as reported in Table S2 was carried out using a single-track assay platform. All assays and data quality assessments were performed according to the manufacturer's instructions. Computation and visualization of LD in the intron 5 region was performed using Haploview V4.2 (5). To evaluate the SNPs in the locus more thoroughly, we studied the LD block (chromosome 9: 100532965–100566031) that contains the lead SNP rs965513 (Fig. 1). We imputed genotypes of the SNPs in this region for the Ohio cohort of 1,146 Caucasian PTC cases and 1,328 Caucasian controls, using a genotype imputation software package (MACH/MACH-Admix program) (5). Known genotypes of the Ohio cohort for the four SNPs in Table S2 and phased haplotypes from 503 EUR samples in 1000 Genomes Project phase3 data were used as references in the imputation. Preimputation quality filters of MAF > 0.01 and Hardy-Weinberg Equilibrium tests were applied for each SNP. Postimputation quality of estimated squared correlation between imputed and true genotypes ( $R_{sq}$ ) > 0.5 was used to filter SNPs with any unreliable imputation calls, and we reran MACH/MACH-Admix to obtain phased haplotypes (Table S3).

**Statistical Analyses.** Association of each genotype or haplotype between cases and controls, adjusting for age and gender, was evaluated by applying logistic regression analysis. The comparison of luciferase activities between two groups was made by applying a *t* test (two tailed). A value of  $P < 0.05$  was considered statistically significant. Data represent the mean  $\pm$  SD.

1. He H, et al. (2011) Mutations in U4atac snRNA, a component of the minor spliceosome, in the developmental disorder MOPD I. *Science* 332(6026):238–240.
2. He H, et al. (2013) Ultra-rare mutation in long-range enhancer predisposes to thyroid carcinoma with high penetrance. *PLoS ONE* 8(5):e61920.
3. Wingender E, et al. (2000) TRANSFAC: An integrated system for gene expression regulation. *Nucleic Acids Res* 28(1):316–319.

4. He H, et al. (2009) A susceptibility locus for papillary thyroid carcinoma on chromosome 8q24. *Cancer Res* 69(2):625–631.
5. Howie B, Fuchsberger C, Stephens M, Marchini J, Abecasis GR (2012) Fast and accurate genotype imputation in genome-wide association studies through pre-phasing. *Nat Genet* 44(8):955–959.

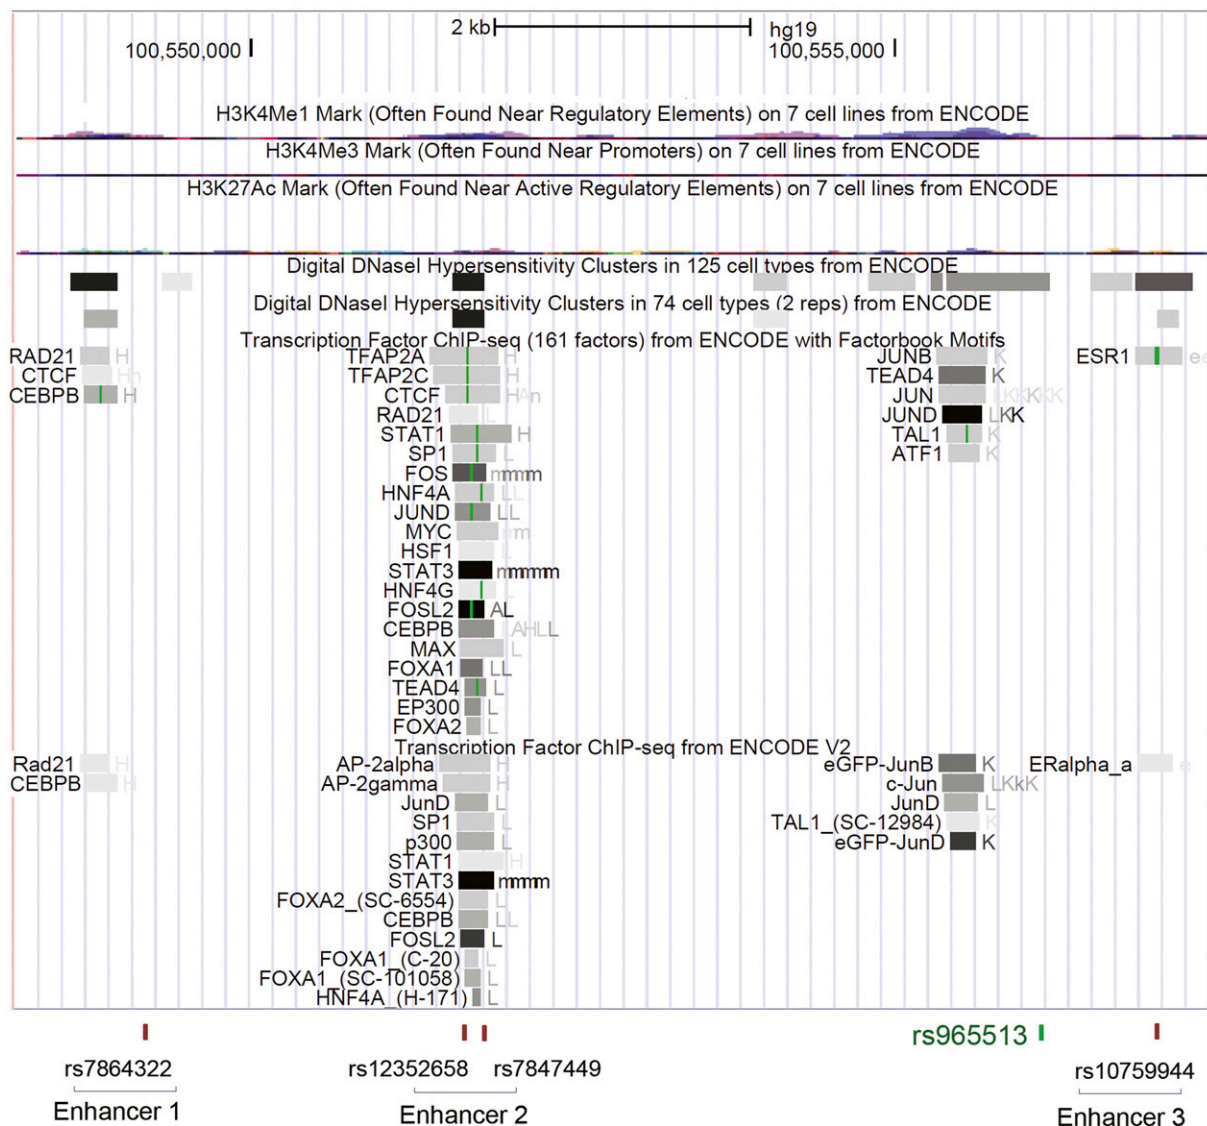

**Fig. S1.** ENCODE data of histone markers of regulatory elements and TF ChIP-sequencing in the rs96513 LD block in 9q22. The information was downloaded from the UCSC Genome Browser ([genome.ucsc.edu](http://genome.ucsc.edu); Assembly GRCh37/hg19). Three genomic regions (enhancers 1–3) and four SNPs tested with the KTC-1 cell line and thyroid tissues are indicated.

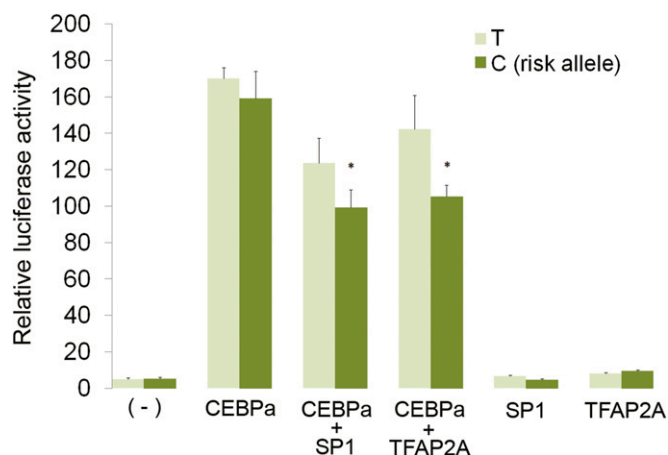

**Fig. S2.** Luciferase enhancer activities of enhancer 1 in HeLa cells. The enhancer activities of the two alleles of rs7864322 were tested and compared in the presence of TFs. \* $P < 0.05$ , Student *t* test.

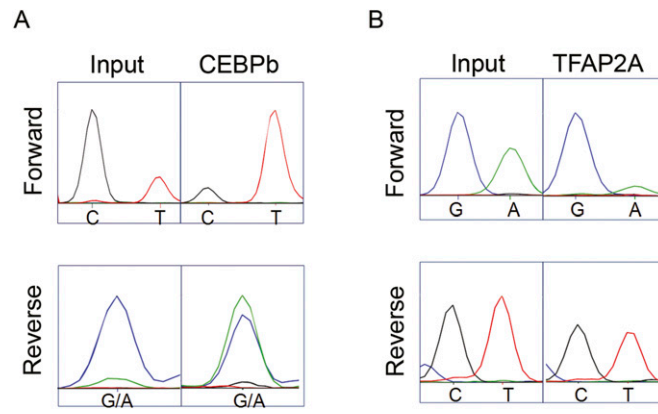

**Fig. S3.** Allelic TF occupancy in KTC-1 cells. Enhancer 1, rs7864322 (A) and enhancer 3, rs10759944 (B) are shown. CHIP assays were performed in KTC-1 cells, followed by a method for SNP analysis (SNaPshot assay). The terms "Forward" and "Reverse" indicate the genomic strand tested in the assay.

**Table S1. SNPs in LD with rs965513 in an ~33-kb block in 9q22**

| SNP         | Position in chromosome 9 (hg19) | D'    | r <sup>2</sup> | Major allele | Minor allele | MAF*  | Comments      |
|-------------|---------------------------------|-------|----------------|--------------|--------------|-------|---------------|
| rs1533180   | 100532965                       | 1.000 | 0.368          | G            | T            | 0.421 |               |
| rs62573973  | 100533183                       | 0.996 | 0.033          | G            | C            | 0.061 |               |
| rs5899324   | 100533317                       | 0.995 | 0.722          | A            | ACT          | 0.411 |               |
| rs71501830  | 100533678                       | 0.996 | 0.037          | T            | C            | 0.068 |               |
| rs12003414  | 100533996                       | 0.996 | 0.037          | T            | C            | 0.068 |               |
| rs1877431   | 100534147                       | 1.000 | 0.741          | G            | A            | 0.407 |               |
| rs7045465   | 100534823                       | 1.000 | 0.741          | T            | A            | 0.407 |               |
| rs72751573  | 100535004                       | 0.999 | 0.073          | T            | C            | 0.126 |               |
| rs7030256   | 100535203                       | 1.000 | 0.991          | G            | C            | 0.339 |               |
| rs7030280   | 100535267                       | 1.000 | 0.991          | T            | C            | 0.339 |               |
| rs16924115  | 100535317                       | 0.998 | 0.039          | C            | T            | 0.072 |               |
| rs117964802 | 100535512                       | 0.991 | 0.011          | C            | T            | 0.022 |               |
| rs62573974  | 100536542                       | 1.000 | 0.290          | C            | T            | 0.364 |               |
| rs141224302 | 100536605                       | 1.000 | 0.290          | TGAAAAGTA    | T            | 0.364 |               |
| rs10983700  | 100537455                       | 1.000 | 0.991          | C            | T            | 0.339 |               |
| rs10983701  | 100537577                       | 0.995 | 0.987          | A            | G            | 0.338 |               |
| rs71487344  | 100537665                       | 0.998 | 0.057          | AAAG         | A            | 0.101 |               |
| rs1588636   | 100537763                       | 0.999 | 0.075          | C            | T            | 0.128 |               |
| rs1588635   | 100537802                       | 0.995 | 0.987          | C            | A            | 0.338 |               |
| rs7028661   | 100538470                       | 0.995 | 0.987          | G            | A            | 0.338 |               |
| rs10818048  | 100538717                       | 0.999 | 0.151          | T            | G            | 0.230 |               |
| rs10818049  | 100538922                       | 0.998 | 0.057          | C            | T            | 0.101 |               |
| rs10818050  | 100538923                       | 0.995 | 0.987          | G            | A            | 0.338 |               |
| rs140405800 | 100539449                       | 0.995 | 0.046          | C            | T            | 0.023 |               |
| rs36052460  | 100539518                       | 0.995 | 0.987          | AT           | A            | 0.338 |               |
| rs10983705  | 100539696                       | 1.000 | 0.292          | G            | C            | 0.365 |               |
| rs12340862  | 100539830                       | 0.998 | 0.057          | T            | C            | 0.101 |               |
| rs72751578  | 100540209                       | 0.999 | 0.075          | C            | A            | 0.128 |               |
| rs7021576   | 100540541                       | 1.000 | 0.991          | T            | C            | 0.339 |               |
| rs2401637   | 100541473                       | 1.000 | 0.991          | C            | T            | 0.339 |               |
| rs12003512  | 100541776                       | 0.996 | 0.037          | G            | A            | 0.068 |               |
| rs118174171 | 100541987                       | 0.989 | 0.011          | T            | C            | 0.022 |               |
| rs10759927  | 100542176                       | 1.000 | 0.991          | G            | A            | 0.339 |               |
| rs142727549 | 100542898                       | 0.914 | 0.032          | A            | AAAAG        | 0.071 |               |
| rs1877432   | 100543880                       | 1.000 | 0.290          | G            | A            | 0.364 |               |
| rs34388138  | 100544140                       | 0.782 | 0.123          | CT           | C            | 0.283 |               |
| rs76230322  | 100544160                       | 0.866 | 0.005          | T            | C            | 0.013 |               |
| rs7847663   | 100544868                       | 1.000 | 0.991          | T            | C            | 0.339 |               |
| rs17429715  | 100544998                       | 0.997 | 0.022          | G            | A            | 0.042 |               |
| rs4743130   | 100546040                       | 1.000 | 0.991          | T            | C            | 0.339 |               |
| rs1561962   | 100546219                       | 1.000 | 0.991          | T            | C            | 0.339 |               |
| rs925488    | 100546391                       | 1.000 | 0.991          | A            | G            | 0.339 |               |
| rs35245612  | 100546486                       | 1.000 | 0.290          | TAA          | T            | 0.364 |               |
| rs925489    | 100546600                       | 1.000 | 0.991          | T            | C            | 0.339 |               |
| rs143350835 | 100547509                       | 0.992 | 0.025          | C            | T            | 0.013 |               |
| rs146736169 | 100547600                       | 0.991 | 0.011          | A            | G            | 0.022 |               |
| rs4273946   | 100547627                       | 1.000 | 0.991          | C            | G            | 0.339 |               |
| rs72751583  | 100547884                       | 0.996 | 0.038          | G            | A            | 0.019 |               |
| rs7020976   | 100547972                       | 1.000 | 0.991          | C            | T            | 0.339 |               |
| rs7032019   | 100548144                       | 1.000 | 0.991          | A            | G            | 0.339 |               |
| rs58187401  | 100548206                       | 0.992 | 0.456          | A            | AGT          | 0.477 |               |
| rs7864322   | 100548934                       | 1.000 | 0.995          | T            | C            | 0.338 | Enhancer 1    |
| rs7850258   | 100549013                       | 1.000 | 0.995          | G            | A            | 0.338 | 3C fragment 4 |
| rs139121661 | 100550001                       | 0.989 | 0.007          | A            | G            | 0.014 |               |
| rs1443438   | 100550028                       | 1.000 | 0.995          | C            | T            | 0.338 |               |
| rs12347079  | 100550227                       | 0.999 | 0.152          | T            | C            | 0.231 |               |
| rs10818071  | 100550253                       | 0.998 | 0.058          | G            | A            | 0.102 |               |
| rs7030241   | 100550375                       | 1.000 | 1.000          | A            | T            | 0.337 |               |
| rs7027030   | 100550455                       | 1.000 | 1.000          | C            | A            | 0.337 |               |
| rs76293252  | 100550482                       | 0.998 | 0.100          | A            | G            | 0.049 |               |
| rs118102144 | 100551260                       | 0.991 | 0.011          | A            | T            | 0.022 |               |
| rs12352658  | 100551768                       | 1.000 | 0.216          | G            | A            | 0.298 | Enhancer 2a   |
| rs7847449   | 100551908                       | 1.000 | 0.242          | C            | A            | 0.323 | Enhancer 2b   |
|             |                                 |       |                |              |              |       | 3C fragment 5 |

**Table S1. Cont.**

| SNP         | Position in chromosome 9 (hg19) | D'    | r <sup>2</sup> | Major allele | Minor allele | MAF*  | Comments      |
|-------------|---------------------------------|-------|----------------|--------------|--------------|-------|---------------|
| rs10739496  | 100552559                       | 1.000 | 1.000          | T            | C            | 0.337 |               |
| rs10983761  | 100553957                       | 1.000 | 1.000          | C            | A            | 0.337 |               |
| rs4743131   | 100554907                       | 1.000 | 1.000          | G            | C            | 0.337 |               |
| rs34883424  | 100555363                       | 0.996 | 0.037          | G            | A            | 0.068 |               |
| rs56202421  | 100555484                       | 0.999 | 0.073          | T            | C            | 0.125 |               |
| rs965513    | 100556109                       | 1.000 | 1.000          | G            | A            | 0.337 | Lead SNP      |
| rs10759944  | 100556972                       | 1.000 | 1.000          | G            | A            | 0.337 | Enhancer 3    |
| rs16924274  | 100557291                       | 0.999 | 0.151          | C            | T            | 0.230 | 3C fragment 6 |
| rs141181809 | 100557521                       | 0.986 | 0.006          | T            | C            | 0.012 |               |
| rs10983789  | 100558738                       | 0.998 | 0.059          | C            | T            | 0.104 |               |
| rs147368517 | 100558780                       | 0.998 | 0.059          | C            | T            | 0.104 |               |
| rs185843906 | 100558785                       | 0.993 | 0.023          | C            | T            | 0.012 |               |
| rs568227990 | 100558818                       | 0.996 | 0.021          | G            | T            | 0.041 |               |
| rs13295081  | 100559011                       | 1.000 | 1.000          | C            | T            | 0.337 |               |
| rs76228779  | 100559045                       | 1.000 | 0.387          | G            | A            | 0.432 |               |
| rs13290258  | 100559093                       | 1.000 | 0.973          | T            | C            | 0.343 |               |
| rs13295254  | 100559114                       | 1.000 | 0.991          | C            | T            | 0.339 |               |
| rs529832869 | 100559154                       | 0.986 | 0.006          | G            | C            | 0.012 |               |
| rs139973818 | 100559360                       | 0.996 | 0.037          | G            | C            | 0.068 |               |
| rs10983795  | 100559632                       | 0.998 | 0.060          | C            | T            | 0.105 |               |
| rs572449192 | 100559923                       | 0.024 | 0.000          | TA           | T            | 0.018 |               |
| rs10983796  | 100560368                       | 1.000 | 0.292          | T            | C            | 0.365 |               |
| rs35342481  | 100561126                       | 0.899 | 0.257          | GA           | G            | 0.385 |               |
| rs1867281   | 100561147                       | 1.000 | 0.292          | A            | G            | 0.365 |               |
| rs73486628  | 100561352                       | 0.994 | 0.022          | G            | A            | 0.042 |               |
| rs10818090  | 100561486                       | 1.000 | 1.000          | T            | C            | 0.337 |               |
| rs187451397 | 100561600                       | 0.987 | 0.005          | T            | C            | 0.011 |               |
| rs12341858  | 100562983                       | 0.998 | 0.047          | G            | A            | 0.085 |               |
| rs79733232  | 100563136                       | 0.992 | 0.025          | T            | C            | 0.013 |               |
| rs10818094  | 100563828                       | 0.979 | 0.166          | G            | A            | 0.255 |               |
| rs112948091 | 100565441                       | 0.481 | 0.089          | A            | AAAAG        | 0.164 |               |
| rs13289390  | 100565568                       | 0.997 | 0.025          | A            | T            | 0.047 |               |
| rs77394667  | 100565813                       | 0.479 | 0.088          | G            | A            | 0.163 |               |
| rs114804130 | 100566031                       | 0.914 | 0.212          | C            | G            | 0.114 |               |

\*MAF was obtained from the 1000 Genomes Project (EUR = 503).

**Table S2. Genotyping and association analyses of Four SNPs in 9q22 in an Ohio cohort**

| SNP         | Major allele | Minor allele | MAF in Control | MAF in case | Risk allele | OR*   | P value* | Risk allele frequency control | Risk allele frequency case | P value conditioned on rs965513 |
|-------------|--------------|--------------|----------------|-------------|-------------|-------|----------|-------------------------------|----------------------------|---------------------------------|
| rs965513    | G            | A            | 0.341          | 0.487       | A           | 1.830 | 1.40E-23 | 0.341                         | 0.487                      |                                 |
| rs16924274  | C            | T            | 0.224          | 0.170       | C           | 1.410 | 2.97E-06 | 0.776                         | 0.830                      | 0.729                           |
| rs140405800 | C            | T            | 0.018          | 0.028       | T           | 1.529 | 0.031    | 0.018                         | 0.028                      | 0.806                           |
| rs76293252  | A            | G            | 0.058          | 0.072       | G           | 1.245 | 0.060    | 0.058                         | 0.072                      | 0.121                           |

Ohio cohort: PTC ( $n = 1,146$ ) and controls ( $n = 1,328$ ).

\*Age- and gender-adjusted.

**Table S3. Haplotype analyses in cases/controls**

| Identification | Haplotype count |         | Frequency |         | OR*   | P value* | Haplotypes <sup>†</sup>                                           |
|----------------|-----------------|---------|-----------|---------|-------|----------|-------------------------------------------------------------------|
|                | Case            | Control | Case      | Control |       |          |                                                                   |
| Hap1           | 880             | 691     | 0.384     | 0.260   | 1.790 | 3.15E-20 | GUAATCCCUTGCAATACAGCCTAGUCCCGUCGTGACATTGTAAGCCACTAACCT-GCTCTACG   |
| Hap2           | 165             | 154     | 0.072     | 0.058   | 1.243 | 0.061    | GUAATCCCUTGCAATACAGCCTAGUCCCGUCGTGACATTGTAGGCCACTAACCT-GCTCTACG   |
| Hap3           | 62              | 46      | 0.027     | 0.017   | 1.541 | 0.029    | GUAATCCCUTGCAATATAGCCTAGUCCCGUCGTGACATTGTAAGCCACTAACCT-GCTCTACG   |
| Hap4           | 751             | 1,068   | 0.328     | 0.402   | 0.701 | 2.09E-08 | TAGTTGTTTCACCGTGUCCTCGAUTTTATTCCAUTGCTGACAGATCGTGCCCA-TCCCGTG     |
| Hap5           | 116             | 158     | 0.051     | 0.059   | 0.837 | 0.167    | GAGTTGTCUCACCGGGCUGCTCGGCTTTAUTCCAUTGCCAACAACTCGTGGTTTC-GTCTTATA  |
| Hap6           | 77              | 120     | 0.034     | 0.045   | 0.727 | 0.036    | GAGTTGTCUCACCGGGCUGCTCGGCTTTAUTCCAUTGCCAACAACTCGTGGTTTC-GTCTTATA  |
| Hap7           | 33              | 62      | 0.014     | 0.023   | 0.635 | 0.037    | GAGTCGTCUCATCGGGCUGATCGGCTTTAUTCCAUTGCCGACAACCTCGGGTCCC-GTCCTATA  |
| Hap8           | 17              | 40      | 0.007     | 0.015   | 0.493 | 0.016    | GAGTTGTCUCACCGGGCUGCTCGGCTTTAUTCCAUTGCCGACAACCTCGTGGTCCC-GTCCTATA |
| Hap9           | 17              | 35      | 0.007     | 0.013   | 0.578 | 0.067    | GAGTTGTCUCACCGGGCUGCTCGGCTTTAUTCCAUTGCCGACAACCTCGTGGTTTC-GTCTTATA |
| Hap10          | 16              | 25      | 0.007     | 0.009   | 0.725 | 0.310    | GAGTTGTCUCACCGGGCUGCTCGGCTTTAUTCCAUTGCCGACAACCTCGGGTCCC-GTCCTATA  |
| Hap11          | 11              | 30      | 0.005     | 0.011   | 0.420 | 0.015    | TAGTTGTTTCACCGTGUCCTCGAUTTTATTCCAUTGCTGACAGCTCGTGCCCA-TCCCGTG     |

U, small nucleotide insertion. The specific nucleotides are as follows: rs5899324, U = ACT; rs141224302, U = TGAAAAGTA; rs36052460, U = AT; rs34388138, U = CT; rs35245612, U = TAA; and rs58187401, U = AGT.

\*Age- and gender-adjusted.

<sup>†</sup>SNPs included in haplotype analyses are as follows: (1) rs1533180, (2) rs5899324, (3) rs1877431, (4) rs7045465, (5) rs72751573, (6) rs7030256, (7) rs7030280, (8) rs62573974, (9) rs141224302, (10) rs10983700, (11) rs10983701, (12) rs1588636, (13) rs1588635, (14) rs7028661, (15) rs10818048, (16) rs10818050, (17) rs140405800, (18) rs36052460, (19) rs10983705, (20) rs72751578, (21) rs7021576, (22) rs2401637, (23) rs10759927, (24) rs1877432, (25) rs34388138, (26) rs7847663, (27) rs4743130, (28) rs1561962, (29) rs925488, (30) rs35245612, (31) rs925489, (32) rs4273946, (33) rs7020976, (34) rs7032019, (35) rs58187401, (36) rs7864322, (37) rs7850258, (38) rs1443438, (39) rs12347079, (40) rs10818071, (41) rs7030241, (42) rs7027030, (43) rs76293252, (44) rs12352658, (45) rs7847449, (46) rs10739496, (47) rs10983761, (48) rs4743131, (49) rs56202421, (50) rs965513, (51) rs10759944, (52) rs16924274, (53) rs10983789, (54) rs147368517, (55) rs13295081, (56) rs76228779, (57) rs13290258, (58) rs13295254, (59) rs10983795, (60) rs10983796, (61) rs1867281, (62) rs10818090, and (63) rs10818094.

**Table S4. Relative risk of Hap1**

| Variable | Total samples | Diplotype |           |           |
|----------|---------------|-----------|-----------|-----------|
|          |               | 0/0       | 0/Hap1    | Hap1/Hap1 |
| Case     | 1,146         | 437 (38%) | 538 (47%) | 171 (15%) |
| Control  | 1,328         | 722 (54%) | 521 (39%) | 85 (6%)   |
| OR*      |               | 1         | 1.695     | 3.423     |
| P value* |               | —         | 1.18E-09  | 4.90E-17  |

Hap1 relative risk for heterozygous (0/Hap1) and homozygous (Hap1/Hap1) compared with risk for noncarriers (0/0) is shown.

\*Logistic regression analyses, adjusting for age and gender.

**Table S5. PCR primer and probe sequences**

| Primer name                                     | Sequence                                |
|-------------------------------------------------|-----------------------------------------|
| <b>Primers for ChIP assay</b>                   |                                         |
| rs7864322-forward (enhancer 1)                  | CATACCAGAGCTGCGACTCA                    |
| rs7864322-reverse (enhancer 1)                  | GCATTCTAAGAGCCACATCCA                   |
| rs12352658-forward (enhancer 2a)                | GGGAGGTGGTGTGTTGAACTG                   |
| rs12352658-reverse (enhancer 2a)                | GCATCCCACCCACATTTTAC                    |
| rs7847449-forward (enhancer 2b)                 | GAGTCCAAAGCAGCATGACA                    |
| rs7847449-reverse (enhancer 2b)                 | ATGCAAGGAGGGAGGAGTT                     |
| rs10759944-forward (enhancer 3)                 | CCCACAGAGAAAAGGTTTGG                    |
| rs10759944-reverse (enhancer 3)                 | CAGGTCAAGGGGACCCTAAT                    |
| <b>Primers for making luciferase constructs</b> |                                         |
| Enhancer 1-forward                              | AAAAATATTGGGGCAGAGG                     |
| Enhancer 1-reverse                              | TTACTCCATTGCCAGATCA                     |
| Enhancer 2a-forward                             | GGGAGGTGGTGTGTTGAACTG                   |
| Enhancer 2a-reverse                             | GCATCCCACCCACATTTTAC                    |
| Enhancer 2b-forward                             | GTAAAATGTGGGTGGGATGC                    |
| Enhancer 2b-reverse                             | GTCATGGTGGTGGGAATAGG                    |
| Enhancer 3-forward                              | CAGCCATGAGTTCACAAACC                    |
| Enhancer 3-reverse                              | CAGAAACCCAAGCTCCTCAG                    |
| <b>Primers for 3C assay</b>                     |                                         |
| Fragment 6_ConstantPrimer_Forward               | CTCCCAAATCATTCCACACAAG                  |
| Fragment 6_Probe                                | 6FAMACCACTGTAATTTCTCTGTTGGAGTCTGCMGBNFQ |
| Fragment15-forward                              | CCC TCT GGA GGA TGC AGT AA              |
| Fragment16-forward                              | CTG ACA TAC GAA GCC GGA AT              |
| Fragment18-forward                              | AGG ACA CCA GGG AGA AAG GT              |
| Fragment19-forward                              | GTG CCT GGT TTA GTC CCA GT              |
| Fragment20-forward                              | ACA CGT TCT TCC CTC ATT GC              |
| Fragment21-forward                              | CCT CTG ACC CCT CAG CTC TA              |
| Fragment 19_ConstantPrimer_Forward              | ACCGTGCCCTGTTTAGTCC                     |
| Fragment 19_Probe                               | 6FAMGGTTTTTAGACTTTGACTAGAAAGCTTMGBNFQ   |
| Fragment2-forward                               | TTA CTA TGG GCT GGG AGG TG              |
| Fragment3-forward                               | GTC CCT TTC CCA GAT CCA TT              |
| Fragment4-forward                               | TGC TAC AAA ACA CTC AGA AAT GC          |
| Fragment5-forward                               | TTGCAGAAGCAAAGTCCCTCT                   |
| Fragment6-forward                               | CTG CAG ACC CAT CCT CAA GT              |
| Fragment7-forward                               | GAC CCA ATC CCA AGG TGT AAT             |
| Fragment8-forward                               | TCG GGC AGA AAA AGA TAT CAG             |
